# Supplementary material
Source: MDPI journal article supplement (https://www.mdpi.com/1999-4907/15/1/72)
Supplement: s1 [file s1]

# Supplementary Materials

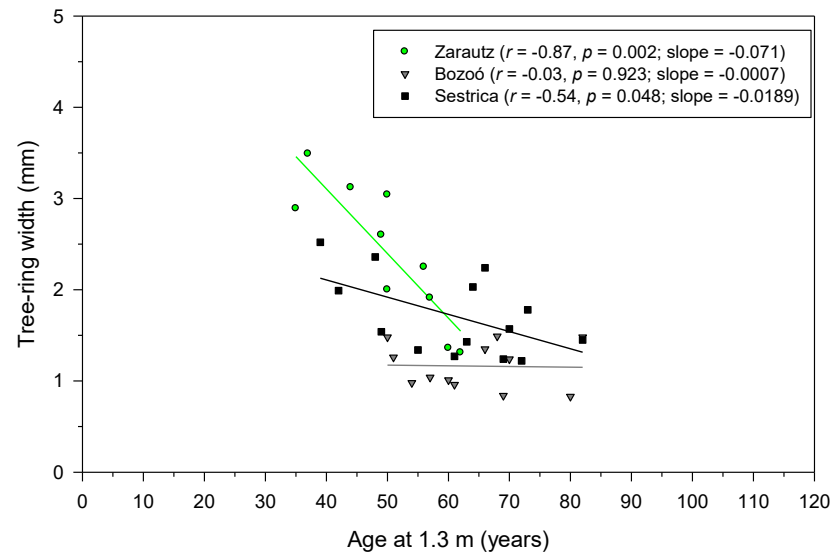

**Figure S1.** Associations found between tree age (estimated at 1.3 m) and mean growth rate (TRW, tree-ring width) in the sampled cork oak populations. The slopes of the age-growth relationships calculated in Zarautz and Sestrica significantly differed according to ANCOVA tests ( $F = 9.83$ ,  $p = 0.005$ ).

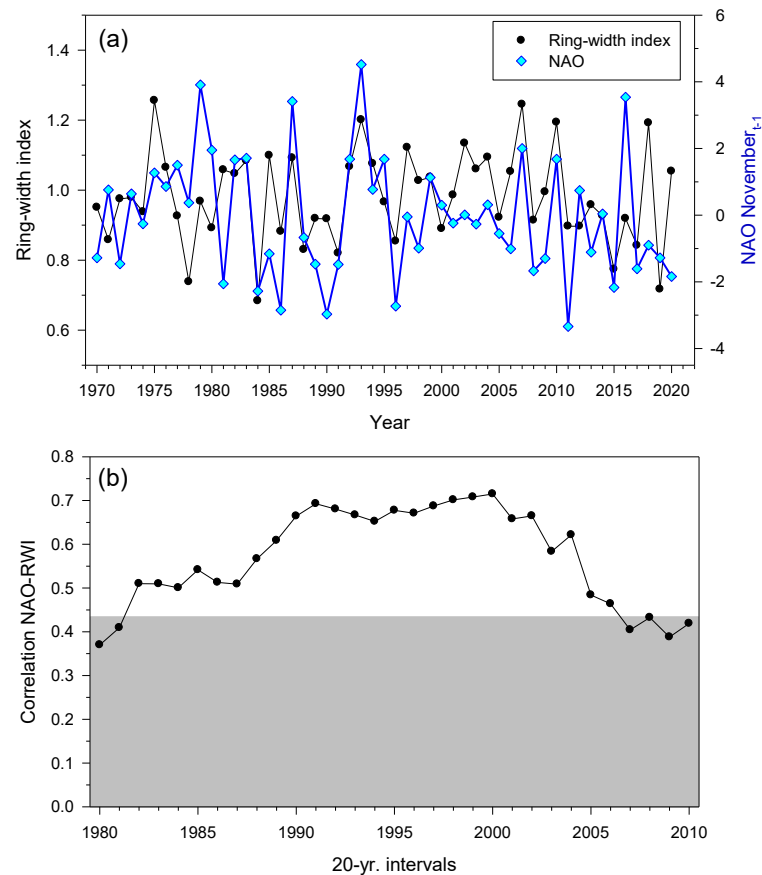

**Figure S2.** (a) Series of ring-width indices from Zarautz and the previous (year  $t-1$ ) November NAO index. (b) Moving correlations between the NAO and ring-width indices based on 20-year moving intervals. The grey box includes non-significant ( $p > 0.05$ ) correlation coefficients.

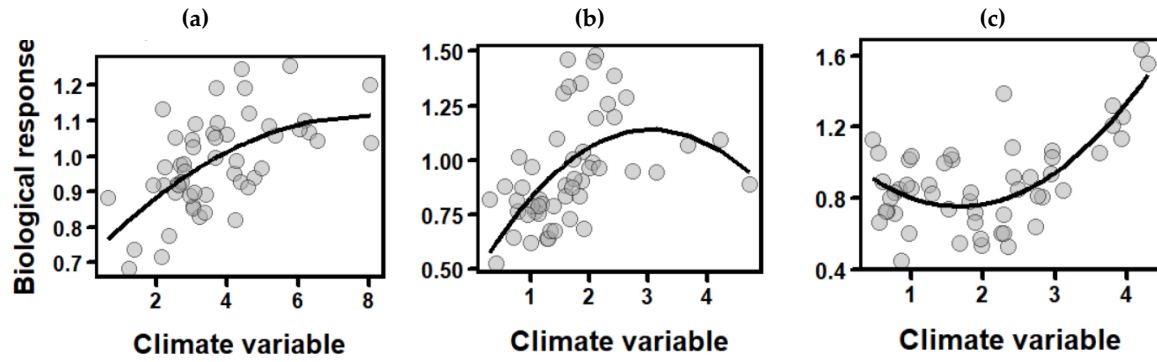

**Figure S3.** Quadratic relationships observed between precipitation (standardized climate variable, x axes) and cork oak series of ring-width indices (biological response, y axes) in (a) Zarautz ( $R^2 = 0.34$ ), (b) Bozoó ( $R^2 = 0.21$ ), and (c) Sestrica ( $R^2 = 0.41$ ). Plots show the best fitted models using daily climate data and the best supported window obtained with climwin. The best climate window was obtained for each type of function.
